# Supplementary material for: Latent class analysis stratifies mortality risk in patients developing acute kidney injury after high-risk intraabdominal general surgery: a historical cohort study
Source: Springer Nature journal article supplement (doi:10.1007/s12630-018-1221-0), 2018-09-12
Supplement: MOESM3 [file 16117552]

**A B Derivation**

100

**Class 1**

**Log Rank Test, P=0.24**

Cumulative Survival Probability (%)

100

Cumulative Survival Probability (%)

# Validation

50 50

### Class 2

#### Log Rank Test, P=0.81

0

0 10 20 30

Days After Acute Kidney Injury Diagnosis

**C**

**0**

0 10 20 30

Days After Acute Kidney Injury Diagnosis

## D

100 100

**Class 3**

**Log Rank Test, P=0.01**

**Class 4**

**Log Rank Test, P=0.45**

Cumulative Survival Probability (%)

Cumulative Survival Probability (%)

50 50

0

0 10 20 30

Days After Acute Kidney Injury Diagnosis

## E

**0**

0 10 20 30

Days After Acute Kidney Injury Diagnosis

## F

100 100

**Class 6**

**Log Rank Test, P=0.31**

**Class 5**

**Log Rank Test, P=0.34**

Cumulative Survival Probability (%)

Cumulative Survival Probability (%)

50 50

0

0 10 20 30

Days After Acute Kidney Injury Diagnosis

**0**

0 10 20 30

Days After Acute Kidney Injury Diagnosis

## G

100

**Class 7**

**Log Rank Test, P=0.17**

Cumulative Survival Probability (%)

**H**

100

Cumulative Survival Probability (%)

# Derivation Validation

50 50

### Group B

#### Log Rank Test, P=0.26

0

0 10 20 30

Days After Acute Kidney Injury Diagnosis

**0**

0 10 20 30

Days After Acute Kidney Injury Diagnosis
